# Supplementary material for: Annotation, phylogenetics, and expression of the nuclear receptors in Daphnia pulex
Source: PubMed Central journal article supplement (PMC2774871; doi:10.1186/1471-2164-10-500), 2009-10-28

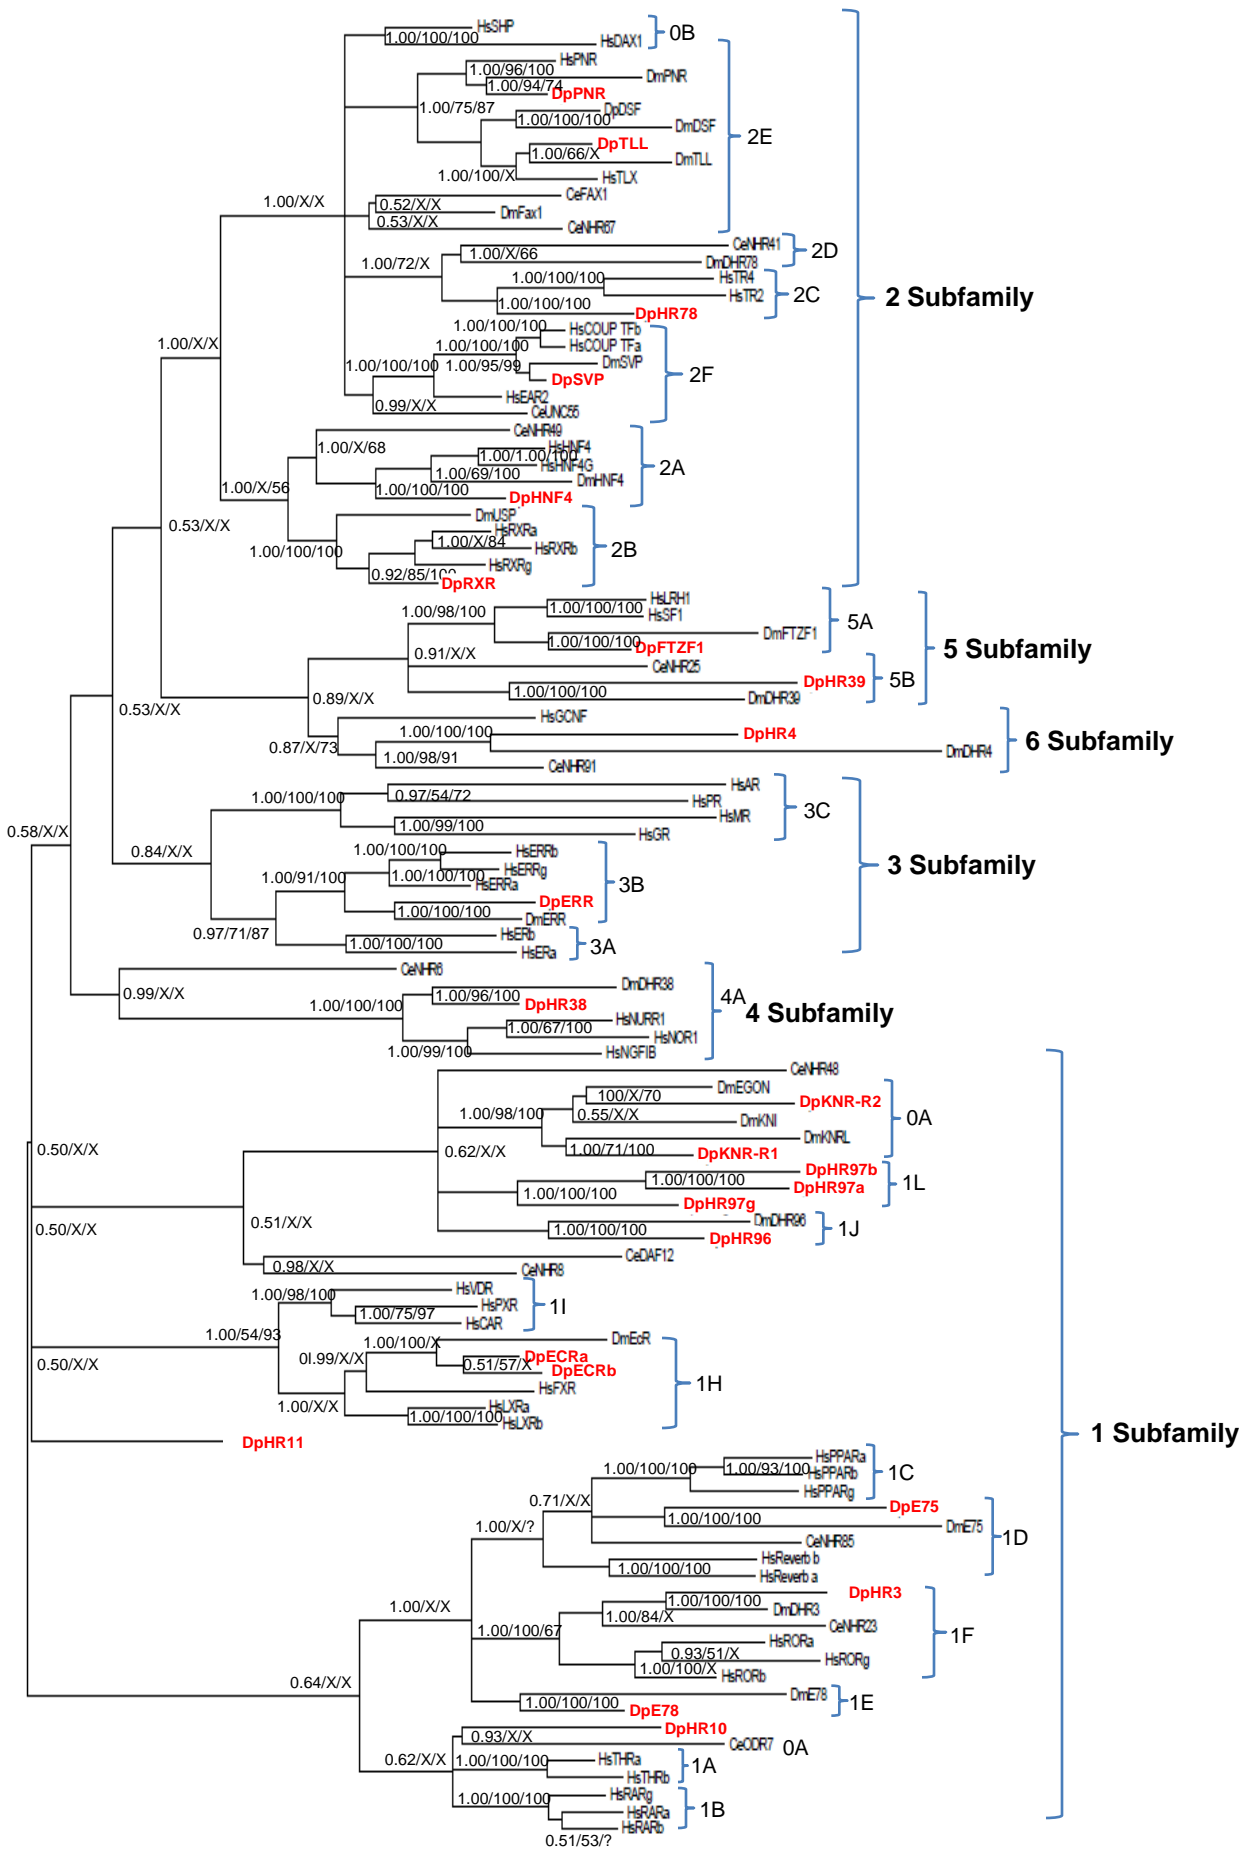

Supplement: 1471-2164-10-500-S4.pdf [file 1471-2164-10-500-S4.pdf]
